# Supplementary material for: Adult Alphitobius diaperinus Microbial Community during Broiler Production and in Spent Litter after Stockpiling
Source: MDPI journal article supplement (doi:10.3390/microorganisms10010175), 2022-01-14
Supplement: s1 [file s1]

Table S2. The mean weekly environmental conditions at the site where the Spent litter was piled.

| Week | T (°C) <sup>a</sup> | Range<br>T (°C) | Rainfall<br>(cm) <sup>b</sup> | Humidity<br>(%) <sup>a</sup> | Wind Speed<br>(kph) <sup>a</sup> |
|------|---------------------|-----------------|-------------------------------|------------------------------|----------------------------------|
| 1    | 18                  | 23-12           | 0.02                          | 50                           | 9                                |
| 2    | 19                  | 25-14           | 0.07                          | 57                           | 3                                |
| 3    | 19                  | 24-14           | 0.18                          | 58                           | 6                                |
| 4    | 21                  | 28-13           | 0.05                          | 55                           | 7                                |
| 5    | 22                  | 31-14           | 0.00                          | 53                           | 6                                |
| 6    | 24                  | 29-20           | 2.05                          | 64                           | 10                               |
| 7    | 26                  | 31-21           | 0.47                          | 68                           | 6                                |
| 8    | 27                  | 33-21           | 0.00                          | 67                           | 4                                |
| 9    | 26                  | 31-21           | 1.27                          | 68                           | 3                                |
| 10   | 27                  | 31-24           | 2.90                          | 74                           | 6                                |
| 11   | 29                  | 34-24           | 0.00                          | 73                           | 6                                |
| 12   | 28                  | 33-23           | 0.05                          | 72                           | 4                                |
| 13   | 28                  | 32-23           | 0.53                          | 73                           | 5                                |
| 14   | 28                  | 33-24           | 0.00                          | 73                           | 4                                |
| 15   | 29                  | 34-24           | 0.00                          | 72                           | 6                                |
| 16   | 29                  | 35-24           | 0.00                          | 73                           | 4                                |
| 17   | 29                  | 34-23           | 0.65                          | 71                           | 3                                |
| 18   | 30                  | 37-23           | 0.00                          | 69                           | 3                                |
| 19   | 32                  | 37-24           | 0.00                          | 74                           | 4                                |
| 20   | 32                  | 39-26           | 0.00                          | 67                           | 4                                |

<sup>a</sup> Mean weekly temperature (T), humidity and wind speed.

<sup>b</sup> Total rainfall for the week.
