# Supplementary material for: Adult Alphitobius diaperinus Microbial Community during Broiler Production and in Spent Litter after Stockpiling
Source: MDPI journal article supplement (doi:10.3390/microorganisms10010175), 2022-01-14
Supplement: s1 [file s1]

Table S1. The feeding regime and basic composition of the ration types fed to the poultry over the grow-out period based on bird age. Bacitracin methylene disalicylate was used as a growth promotor at 50 ppm (50g/ton feed) with the starter, grower and finisher rations. Note: detailed feed composition is proprietary.

| Bird Age<br>(days) | Ration                   | Crude Protein<br>(%) | Vitamin<br>(%) | Trace Mineral<br>(%) | Metabolizable Energy<br>Kcal Kg <sup>-1</sup> |
|--------------------|--------------------------|----------------------|----------------|----------------------|-----------------------------------------------|
| 1-15               | Starter                  | 20                   | 100            | 100                  | 2850                                          |
| 15-28              | Grower                   | 19                   | 80             | 80                   | 2900                                          |
| 29-39              | Finisher #1              | 16                   | 60             | 60                   | 3000                                          |
| 40-46              | Finisher #2 <sup>a</sup> | 15                   | 40             | 40                   | 3000                                          |
| 47-50              | Withdrawal <sup>b</sup>  | 15                   | 40             | 40                   | 3000                                          |

<sup>a</sup> If birds are older than 50 days, Finisher #2 is fed for a longer period of time.

<sup>b</sup> Withdrawal ration is fed only for the last 3 days of the grow-out, and is Finisher #2 without additives.
