# Supplementary figures and images for: Adult Alphitobius diaperinus Microbial Community during Broiler Production and in Spent Litter after Stockpiling
Source: MDPI journal article supplement (doi:10.3390/microorganisms10010175), 2022-01-14

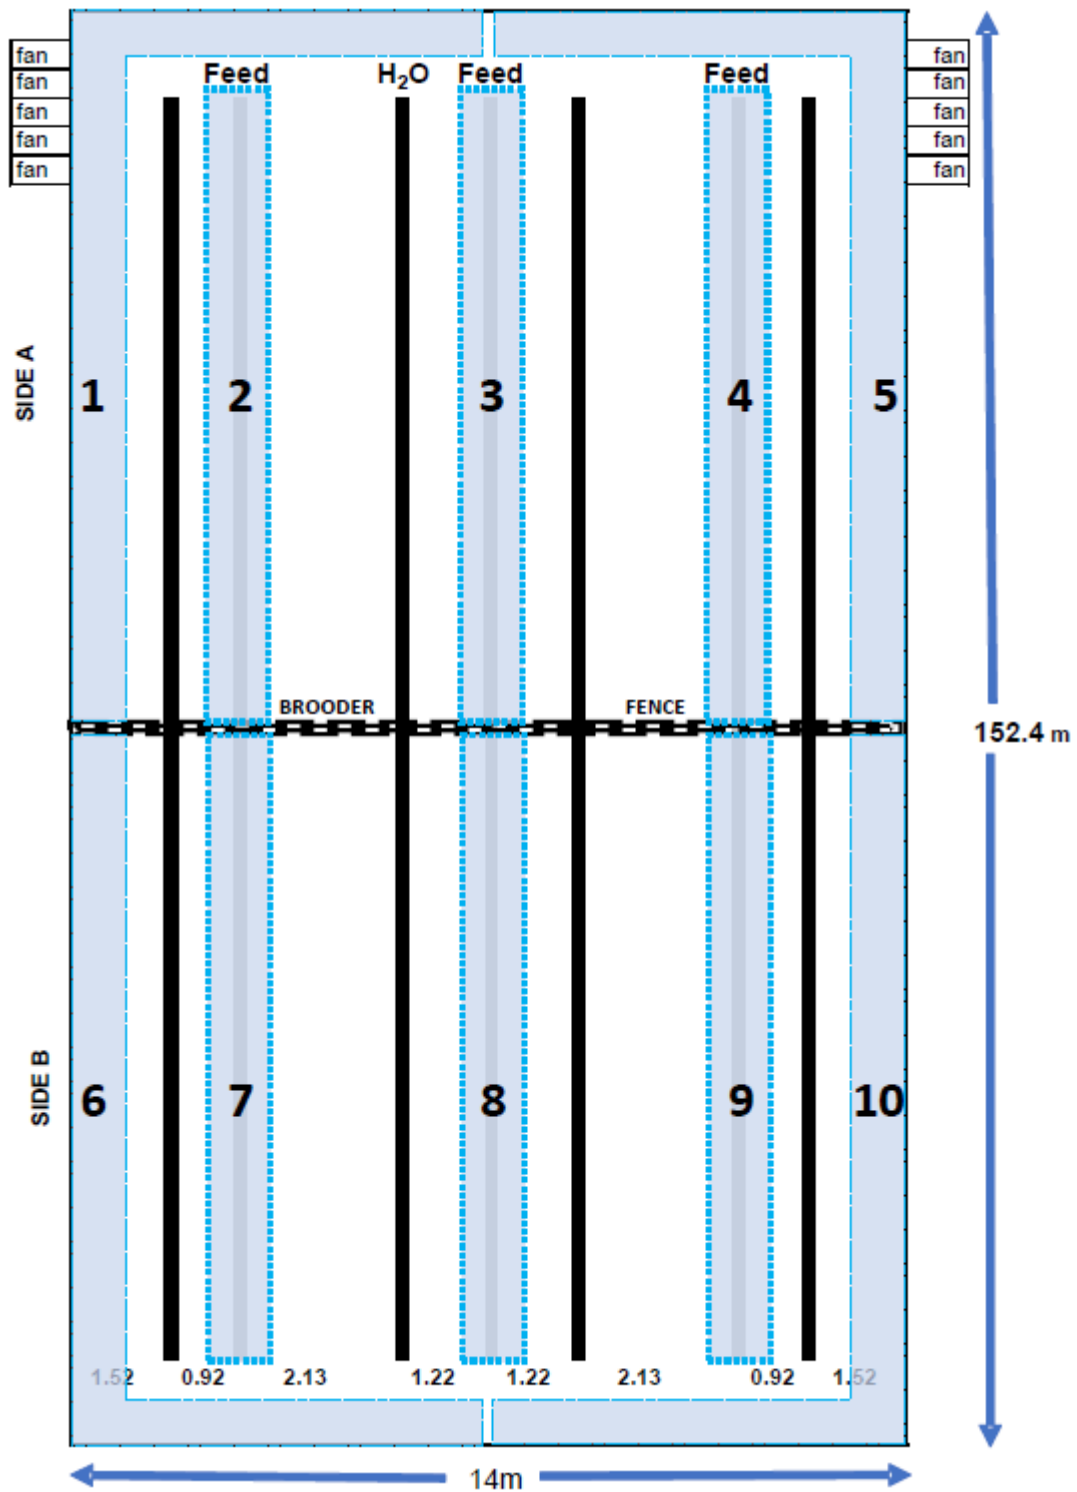

Figure S1: Schematic of the broiler facility.

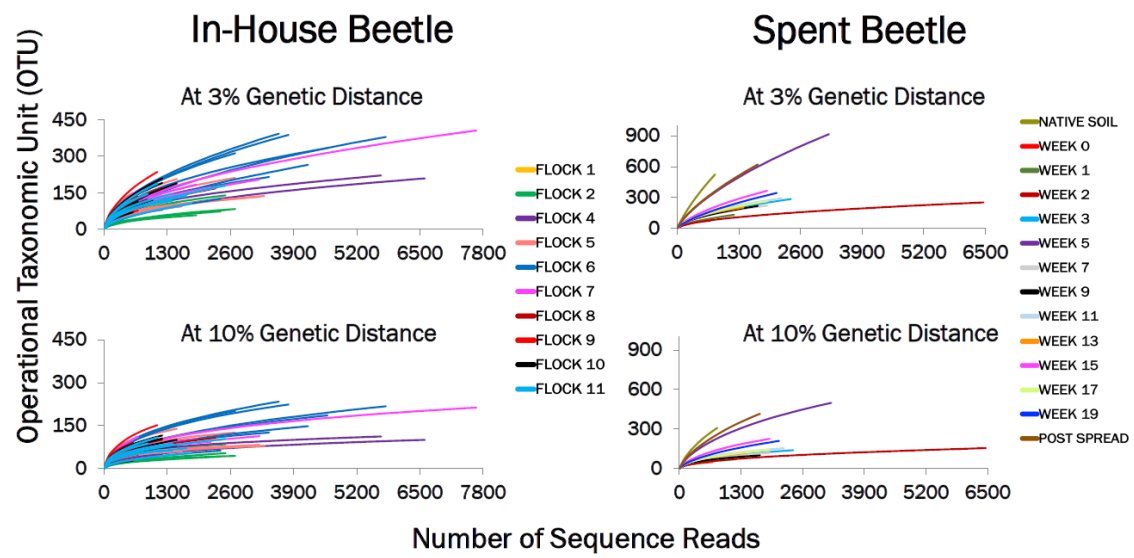

Figure S2: Rarefaction Curves.

Supplement: s1 [file s1]
